# Supplementary material
Source: PubMed Central journal article supplement (PMC5460839)

## Supplemental Figure Legends

### Supplemental Figure 1: Characterization of Tadipo mice on chow diet

**a-b)** qPCR analysis of TLR4 and IL1  $\beta$  mRNA expression in various tissue normalized to TLR4<sup>fl/fl</sup>. **c)** 10 week body weight follow up (n=10~15). **d)** oral glucose tolerance test (2.5 mg/g BW). **e)** insulin tolerance test (0.75 mU/g BW). **f)** triglyceride clearance test (15ml/kg BW of 20% intralipid) (n=4). **g)** glucose infusion rate during hyperinsulinemic euglycemic clamp (n=4~5). **h)** glucose infusion rate after acute lard infusion during hyperinsulinemic euglycemic clamp (n=4~5). \*p<0.05 compared to TLR4<sup>fl/fl</sup>.

Data are presented as means  $\pm$  SEM

### Supplemental Figure 2: $\beta$ 3 adrenergic receptor stimulation and average adipocyte size

**a)** Circulating NEFA (non-esterified fatty acid) (left) and triglyceride concentrations (right) in male TLR4<sup>fl/fl</sup> and Tadipo mice during a  $\beta$ -3 adrenergic agonist sensitivity test (1 mg per kg body weight) CL316,243 intraperitoneally, n = 5 TLR4<sup>fl/fl</sup>, n=10 Tadipo) on chow diet.

**b)** Circulating NEFA (left) and triglyceride concentrations (right) in male TLR4<sup>fl/fl</sup> and Tadipo mice during a  $\beta$ -3 adrenergic agonist sensitivity test (n = 6 TLR4<sup>fl/fl</sup>, n=7 Tadipo) after chronic HFD.

**c)** Average adipocytes sized (n $\geq$ 105).

### Supplemental Figure 3: Insulin levels during hyperinsulinemic euglycemic clamps

**a-c)** plasma insulin measured at basal and steady state during hyperinsulinemic euglycemic clamp after 3 week HFD, chronic HFD, and lard infusion. **d-f)** hepatic glucose production during hyperinsulinemic euglycemic clamp after 3 week HFD, chronic HFD, and lard infusion. \*p<0.05 compared to TLR4<sup>fl/fl</sup>.

Data are presented as means  $\pm$  SEM

### Supplemental Figure 4: Plasma and tissue sphingolipid analysis with and without HFD challenge

**a-b)** plasma. **c-d)** liver. **e-f)** sWAT ceramide level after 8 weeks Dox chow or HFD induction.

**Supplemental Table 1: Primer sets for qPCR analysis**

| Gene           | Forward primer            | Reverse primer             |
|----------------|---------------------------|----------------------------|
| Acc1           | TGGACAGACTGATCGCAGAGAAAG  | TGGAGAGCCCCACACACA         |
| Acox 1         | TCCCGATCTGCGCAAGGAGC      | CTGGTGAAGCAAGGTGGGCA       |
| $\beta$ -actin | TACCACAGGCATTGTGATGG      | TTTGATGTCACGCACGATTT       |
| Fas            | GCTGCGGAAACTTCAGGAAAT     | AGAGACGTGTCACTCCTGGACTT    |
| IL 1 $\beta$   | CAACCAACAAGTGATATTCTCCATG | GATCCACACTCTCCAGCTGCA      |
| Scd1           | CCGGAGACCCCTTAGATCGA      | TAGCCTGTAAAAGATTTCTGCAAACC |
| SREBP1-c       | GGAGCCATGGATTGCACATT      | CAGGAAGGCTTCCAGAGAGG       |
| TLR4           | GACACCAGGAAGCTTGAATCC     | TGATCCATGCATTGGTAGGTAA     |

**Supplemental Table 2: Primer sets to screen TLR4 deletion**

| Gene   | Forward primer           | Reverse primer           |
|--------|--------------------------|--------------------------|
| fl/fl  | GACTTGAGAGTTATGTAACACCTG | TCCTATAGACCAGTCTGGCCTTAA |
| Tadipo | GACTTGAGAGTTATGTAACACCTG | GTGGCTATGTTCCAGTTTGAATG  |

# Supplemental Figure 1

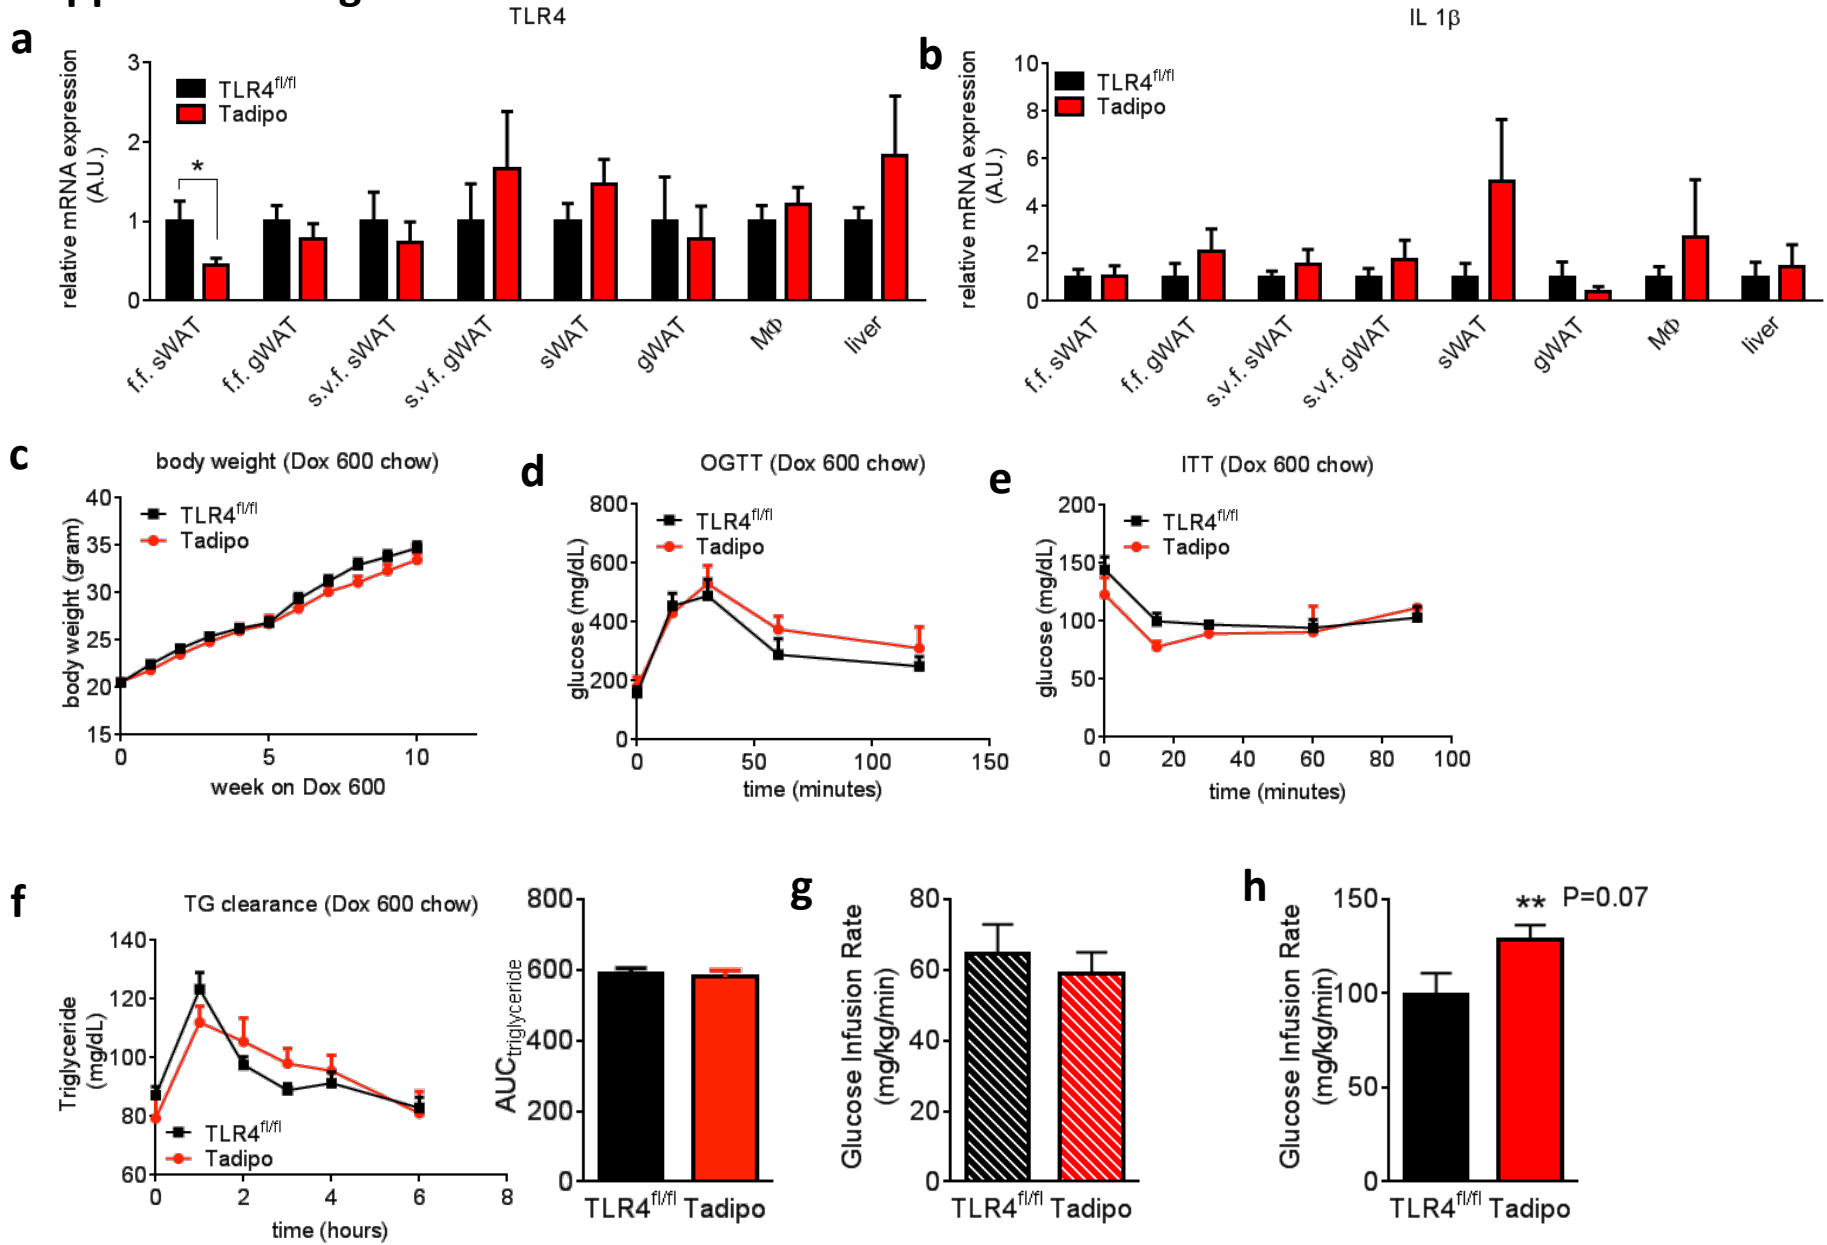

## Supplemental Figure 2

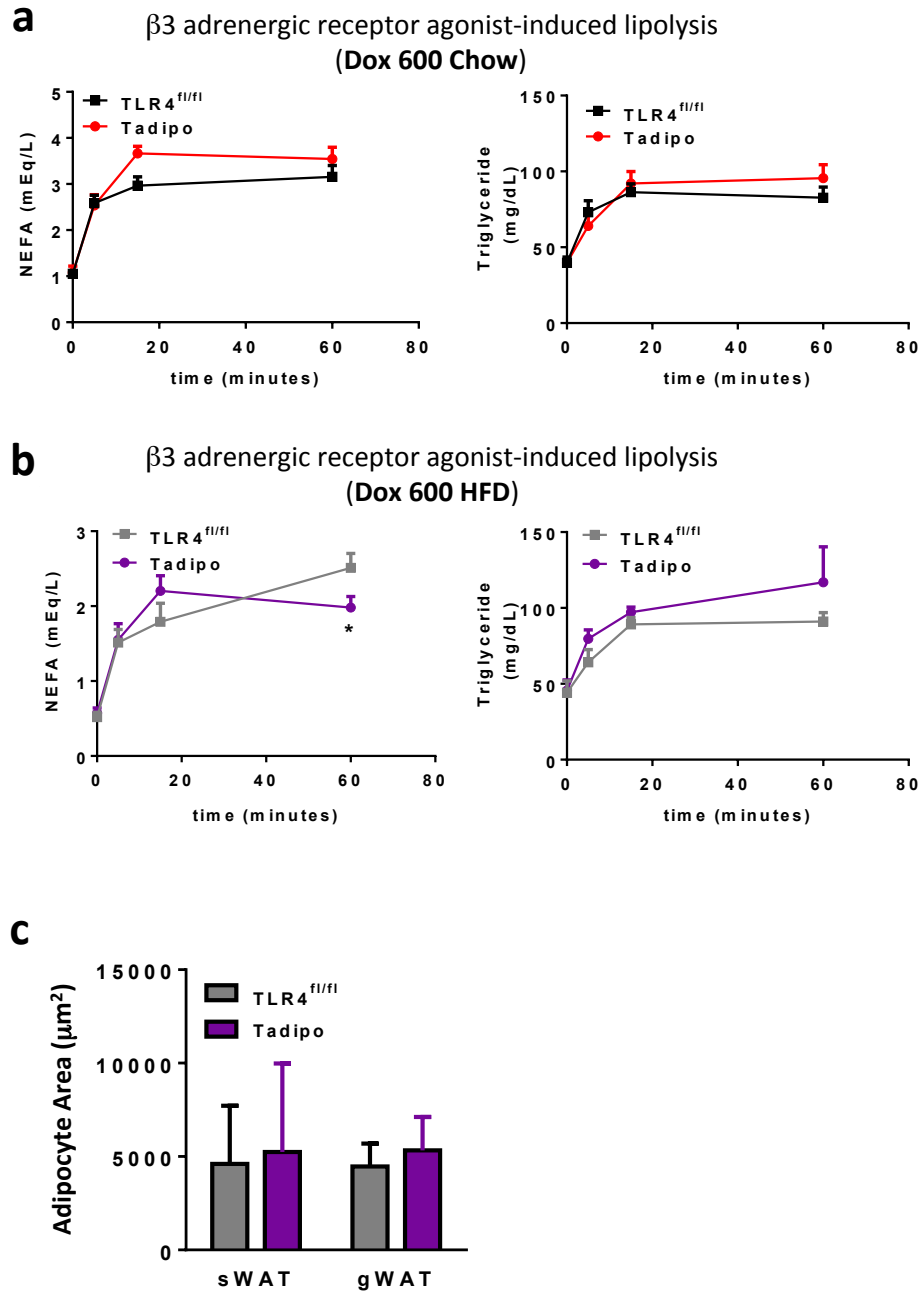

## Supplemental Figure 3

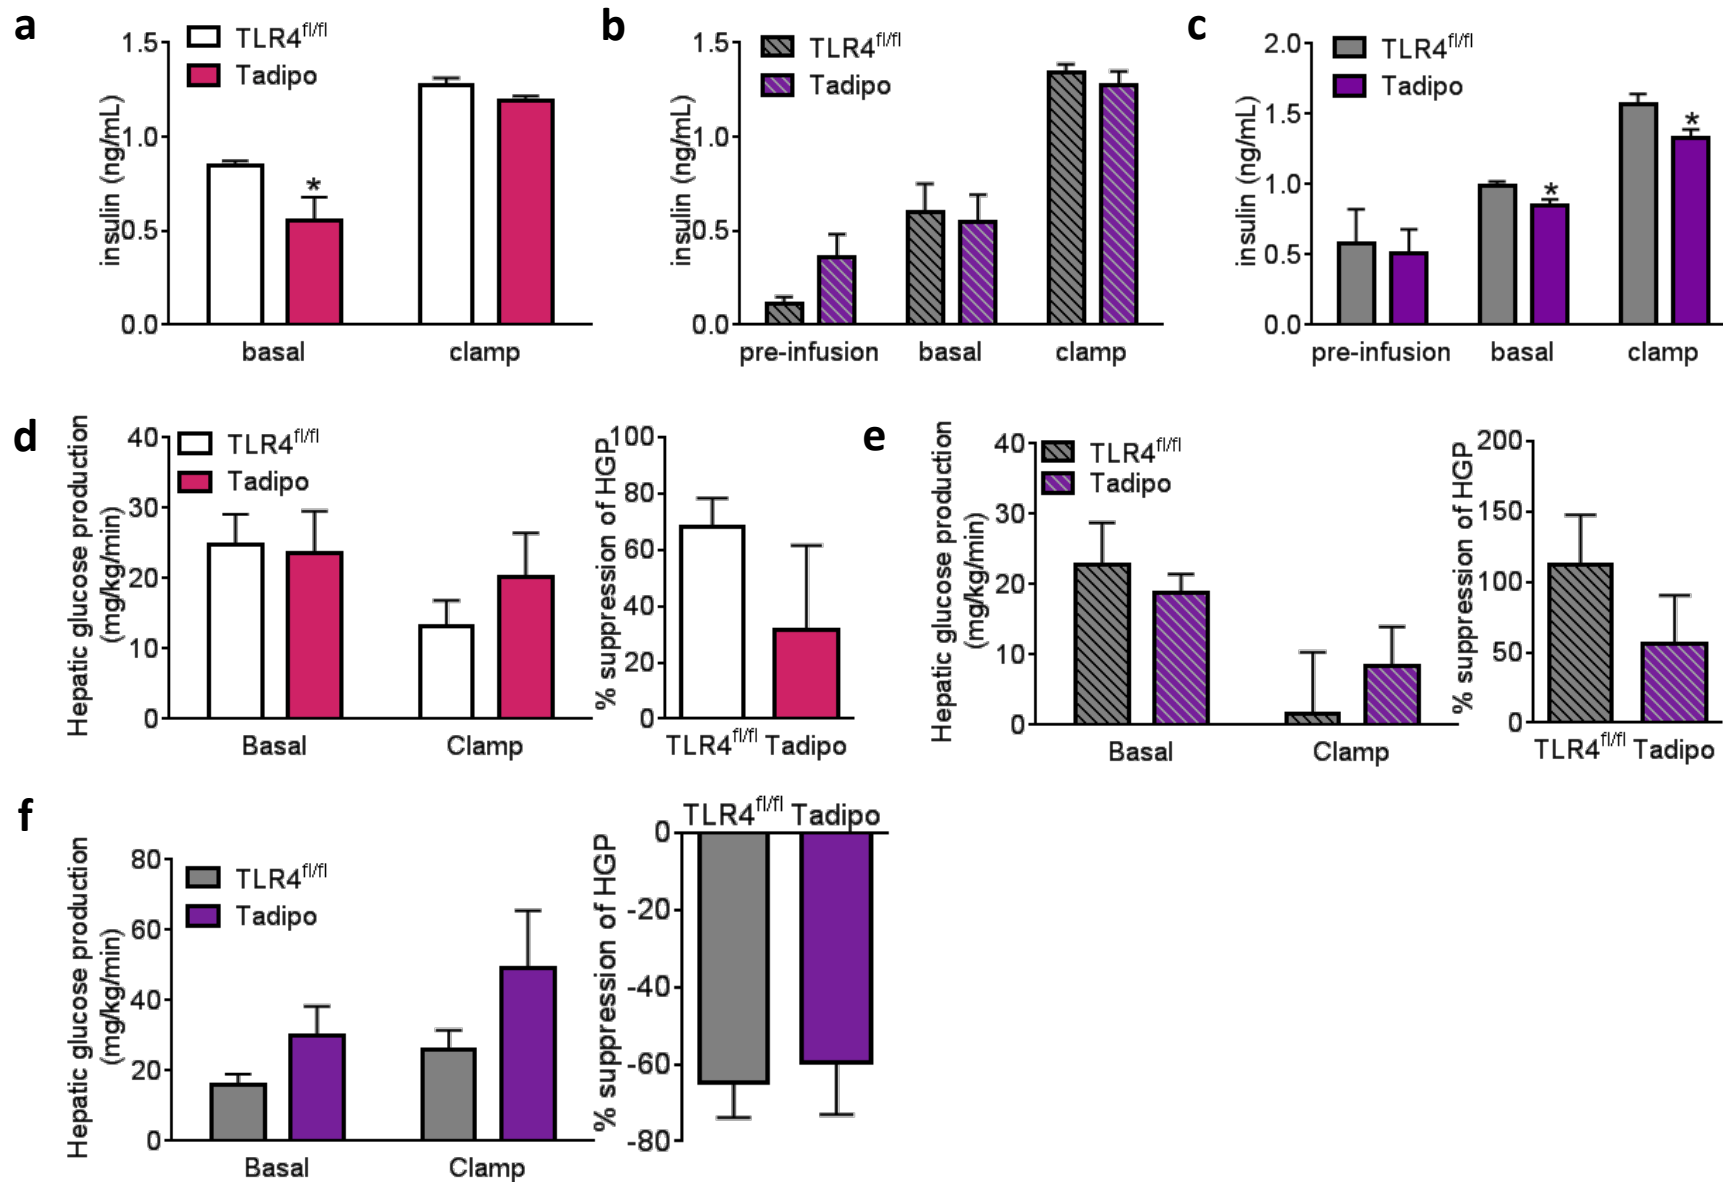

# Supplemental Figure 4

**a**

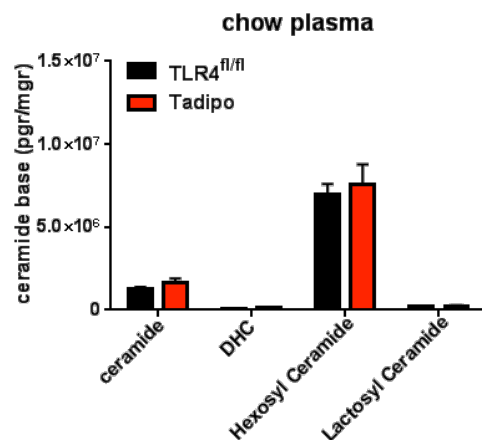

**b**

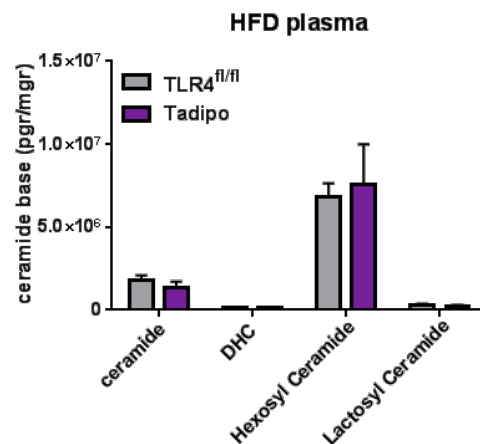

**c**

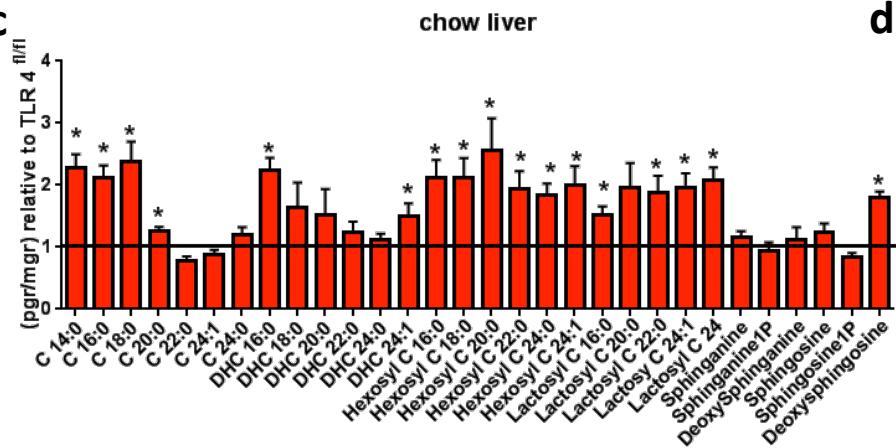

**d**

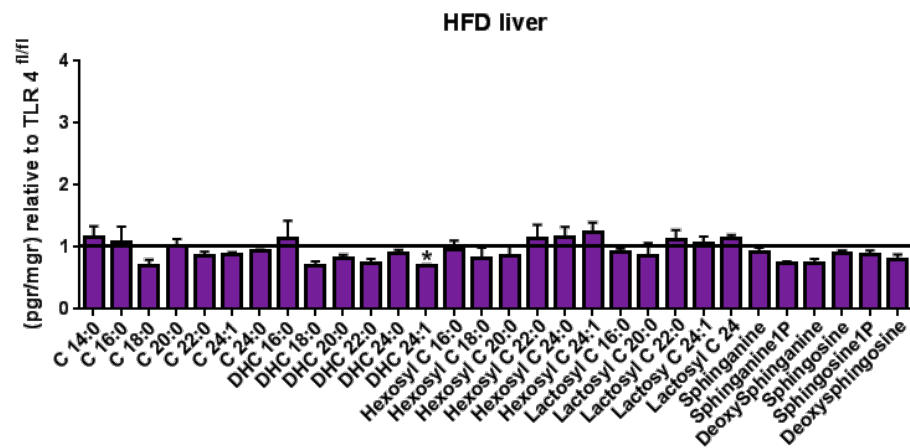

**e**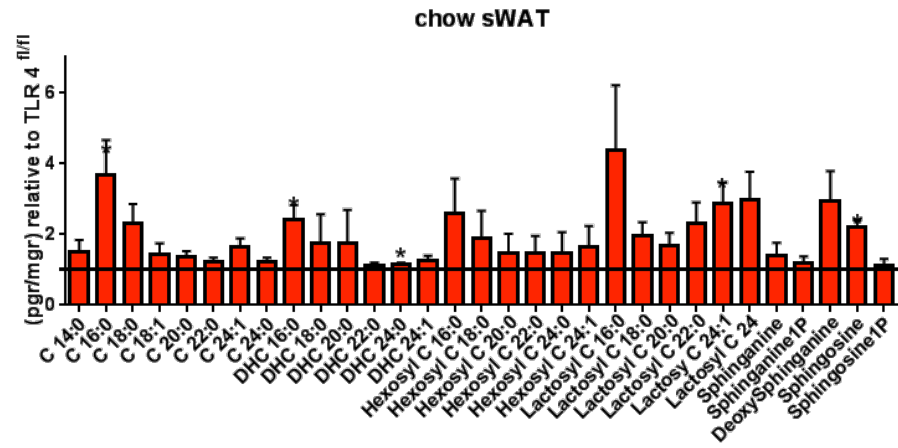**f**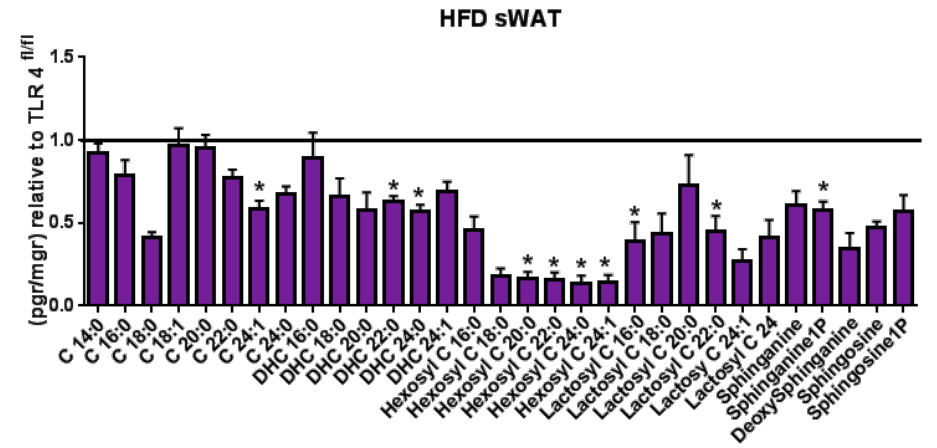

Supplement: en.2017-00024.sd1.pdf [file en.2017-00024.sd1.pdf]
